# Supplementary material for: On the diverse and opposing effects of nutrition on pathogen virulence
Source: PubMed Central journal article supplement (PMC6650706; doi:10.1098/rspb.2019.1220), 2019-07-10
Supplement: rspb20191220supp1.pdf [file rspb20191220supp1.pdf]

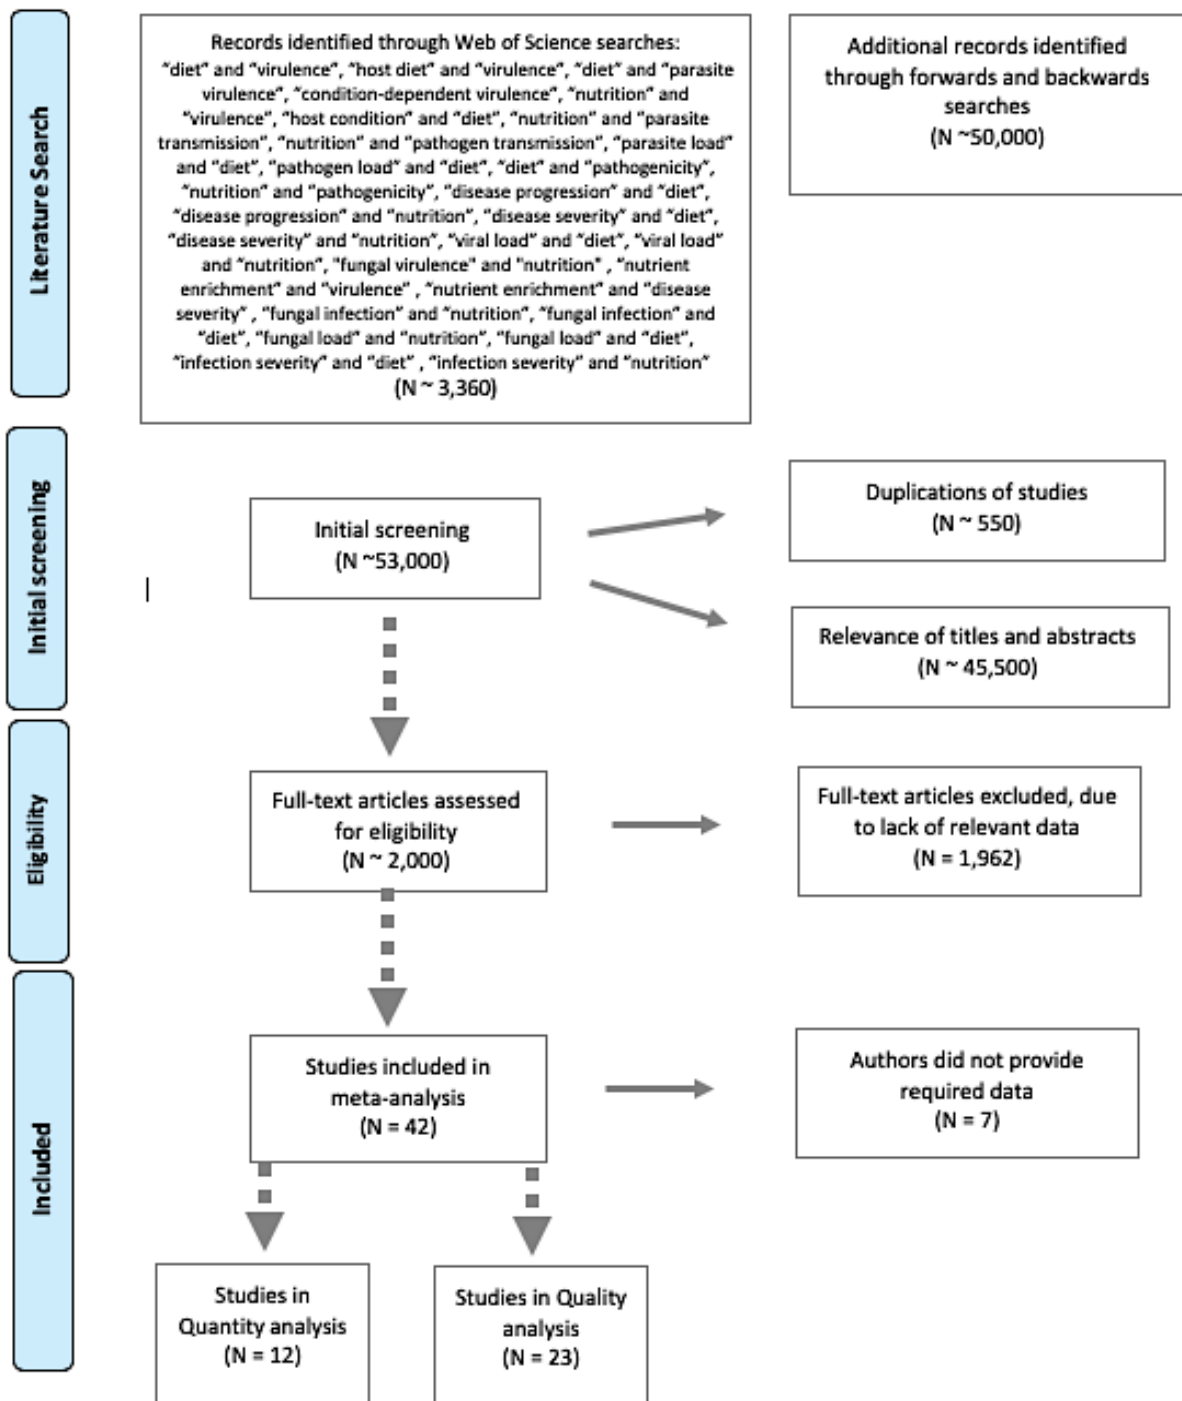

Supplementary Figure 1: PRISMA flow chart detailing data collection.

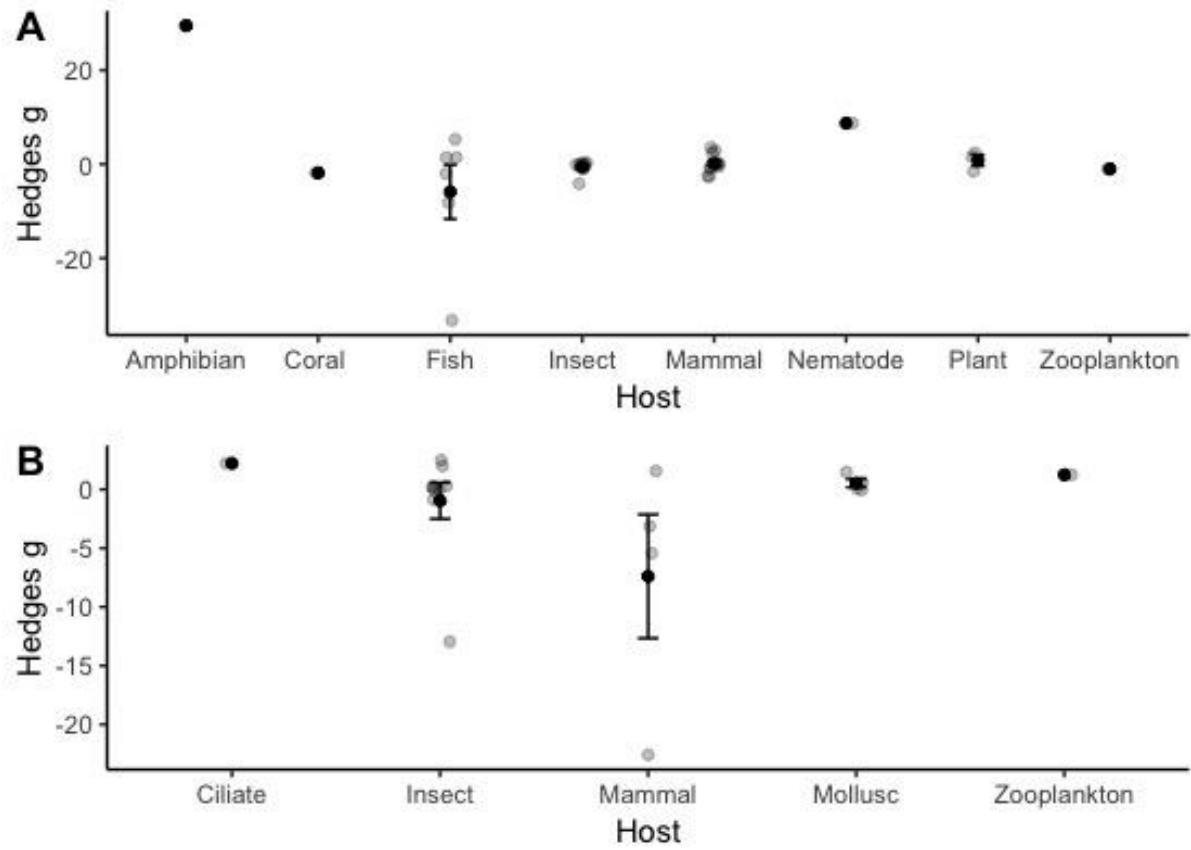

Supplementary Figure 2: Virulence effect size (Hedge's *g*) for different host types for treatments affecting nutrient quality (A) and quantity (B). Black points represent mean values +/- 1 S.E. Raw data are shown as jittered points.

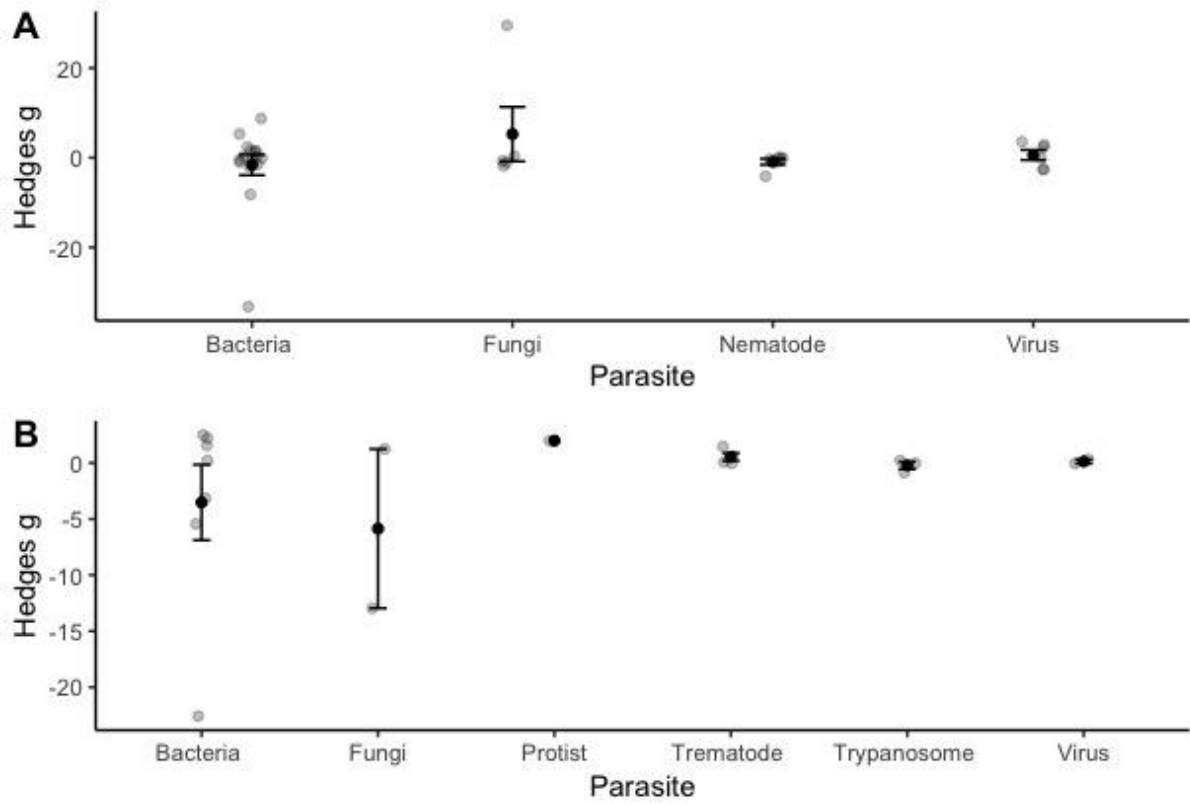

Supplementary Figure 3: Virulence effect size for different pathogen types for treatments affecting nutrient quality (A) and quantity (B). Black points represent mean values  $\pm$  1 S.E.. Raw data are shown as jittered points.

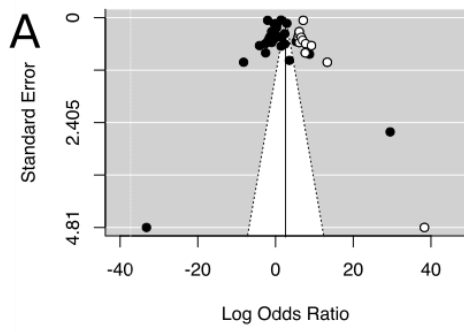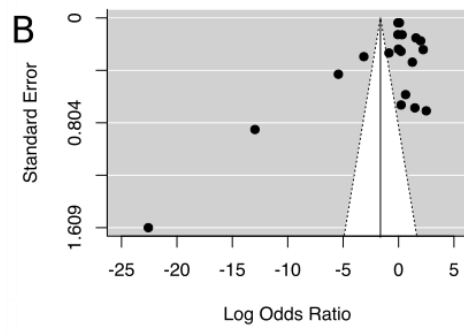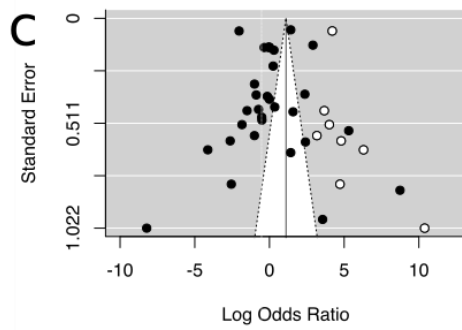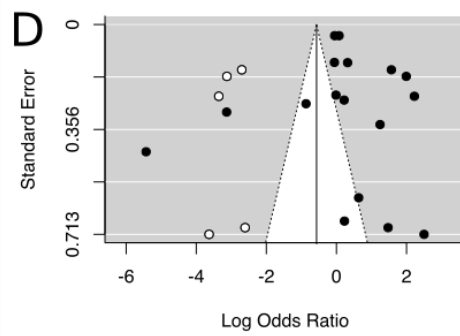

Supplementary Figure 4: Trim and fill plots for the nutrient quality (A, C) and quantity (B, D) meta-analyses, with outliers included (A and B) and removed (C and D).



Supplementary Table 1: A table showing the studies used in the nutrient quality meta-analysis. ' \* ' denote outliers.

| Host (vertebrate (V)/invertebrate (In)/plant (P)) | Pathogen                   | Treatment type | Specific change to nutrition | Change in virulence (+ increase, - decrease, = no change) | Hedge's g | Refs |
|---------------------------------------------------|----------------------------|----------------|------------------------------|-----------------------------------------------------------|-----------|------|
| <i>Caenorhabditis elegans</i> (In)                | Staphylococcus aureus (E)  | High v Control | Glucose                      | +                                                         | 8.739     | (64) |
| <i>Mus sp</i> (V)                                 | Coxsackievirus B3          | High v Low     | Vitamin E                    | +                                                         | -2.553    | (32) |
| <i>Mus sp</i> (V)                                 | Staphylococcus aureus (E)  | High v Control | Manganese                    | +                                                         | 3.559     | (47) |
|                                                   |                            | Control v Low  | Manganese                    | +                                                         | -1.002    |      |
| <i>Plutella xylostella</i> (In)                   | Metarhizium anisopliae (E) | High v Control | Carbon and Nitrogen          | -                                                         | -0.732    | (65) |
|                                                   |                            | Control v Low  | Carbon and Nitrogen          | -                                                         | 0.352     |      |
| <i>Mus sp</i> (V)                                 | Coxsackievirus B3          | Control v Low  | Selenium                     | -                                                         | -2.630    | (14) |
| <i>Mus sp</i> (V)                                 | Citrobacter rodentium (E)  | Control v Low  | Selenium                     | -                                                         | -0.518    | (55) |
| <i>Tenebrio molitor</i> (In)                      | Heterorhabditis indica (E) | High v Control | Lipid                        | +                                                         | -0.352    | (66) |
|                                                   |                            |                | Protein                      | -                                                         | 0         |      |
| <i>Tenebrio molitor</i> (In)                      | Steinernema riobrave (E)   | High v Control | Lipid                        | =                                                         | -0.075    | (66) |

|                                |                                           |                |                                          |   |        |      |
|--------------------------------|-------------------------------------------|----------------|------------------------------------------|---|--------|------|
|                                |                                           |                | Protein                                  | = | -4.128 |      |
| <i>Manduca sexta</i> (In)      | Heterorhabditis sonorensis (E)            | Control v Low  | Lower quality feed                       | = | -0.886 | (67) |
| <i>Manduca sexta</i> (In)      | Steinernema carpocapsae (E)               | Control v Low  | Lower quality feed                       | + | 1.424  | (67) |
| <i>Ictalurus punctatus</i> (V) | Flavobacterium columnare (E)              | High v Low     | Lower CuSO <sub>4</sub> supplementation  | - | -2.033 | (68) |
|                                |                                           |                | Higher CuSO <sub>4</sub> supplementation | = | 0.247  |      |
| <i>Apis mellifera</i> (In)     | Melissococcus plutonius (E)               | High v Low     | Potassium                                | = | 0.247  | (69) |
| <i>Daphnia dentifera</i> (In)  | Metschnikowia bicuspidate (E)             | High v Low     | Environmental nutrients                  | = | -1.007 | (50) |
| <i>Morone saxatilis</i> (V)    | Mycobacterium marinum (Int)               | High v Low     | Lower quality feed                       | + | 5.306  | (70) |
| <i>Macaca mulatta</i> (V)      | Simian Immunodeficiency Virus (SIV) (Int) | High v Low     | Micronutrient supplements                | + | -0.002 | (46) |
| <i>Homo sapien</i> (V)         | Mycobacterium tuberculosis (Int)          | High v Control | Vitamin A and Zinc                       | = | 0.298  | (71) |

|                                    |                                          |                |                             |   |          |      |
|------------------------------------|------------------------------------------|----------------|-----------------------------|---|----------|------|
| <i>Homo sapien</i> (V)             | Human immunodeficiency virus HIV-1 (Int) | High v Control | Vitamin E and C             | - | 2.368    | (54) |
| <i>Mus sp</i> (V)                  | <i>Clostridium difficile</i> (E)         | Control v Low  | Protein                     | = | -0.505   | (53) |
| <i>Cucumis melo</i> (P)            | <i>Acidovorax citrulli</i> (E)           | High v Low     | Potassium                   | - | 2.409    | (72) |
| <i>Lycopersicon esculentum</i> (P) | <i>Ralstonia solanacearum</i> (E)        | Control v Low  | Calcium                     | - | 1.579    | (33) |
|                                    |                                          | High v control | Calcium                     | - | -1.500   |      |
| <i>Homo sapien</i> (V)             | Human immunodeficiency virus HIV-1 (Int) | High v Low     | Micronutrient supplements   | - | 2.910    | (48) |
| <i>Dicentrarchus labrax</i> (V)    | <i>Vibrio pelagius</i>                   | High v Control | Shrimp protein hydrolysate  | - | 1.424    | (73) |
| <i>Oncorhynchus mykiss</i> (V)     | <i>Flavobacterium columnare</i>          | High v Low     | Growth medium (Shieh broth) | + | -33.212* | (74) |
| <i>Danio rerio</i> (V)             | <i>Flavobacterium columnare</i>          | High v Low     | Growth medium (Shieh broth) | + | -8.219   | (74) |
| <i>Gorgonia ventalina</i> (In)     | <i>Aspergillus sydowii</i>               | High v Control | Fertilizer                  | + | -1.839   | (75) |
| <i>Pseudacris regilla</i> (V)      | <i>Batrachochytrium dendrobatidis</i>    | High v Control | Nitrogen and Phosphorus     | - | 29.498*  | (76) |



| Supplementary table 2: A table showing all of the studies used in the nutrient quantity meta-analysis. ' * ' denote outliers |                                                                   |                |                                                           |           |       |
|------------------------------------------------------------------------------------------------------------------------------|-------------------------------------------------------------------|----------------|-----------------------------------------------------------|-----------|-------|
| Host (Vertebrate (V)/ Invertebrate (In))                                                                                     | Pathogen                                                          | Treatment type | Change in virulence (+ increase, - decrease, = no change) | Hedge's g | Study |
| <i>Mus sp</i> (V)                                                                                                            | <i>Staphylococcus aureus</i> (E)                                  | Control v Low  | +                                                         | 1.568     | (77)  |
| <i>Paramecium caudatum</i> (ciliate)                                                                                         | <i>Holospora undulata</i> (Int)                                   | High v Low     | +                                                         | 2.224     | (78)  |
| <i>Aedes aegypti</i> (In)                                                                                                    | <i>Vavraia culicis</i>                                            | High v Low     | +                                                         | -12.959*  | (8)   |
| <i>Potamopyrgus antipodarum</i> (In)                                                                                         | <i>Microphallus sp</i> (E)                                        | High v Control | =                                                         | -0.051    | (79)  |
| <i>Potamopyrgus antipodarum</i> (In)                                                                                         | <i>Notocotylus gippyensis</i> (E)                                 | High v Control | +                                                         | 0.075     | (79)  |
| <i>Bombus impatiens</i> (In)                                                                                                 | <i>Crithidia sp</i> (E)                                           | High v Low     | -                                                         | -0.013    | (51)  |
| <i>Trichoplusia ni</i> (In)                                                                                                  | Autographa californica multiple nucleopolyhedrovirus AcMNPV (Int) | Control v Low  | +                                                         | 0.319     | (15)  |
|                                                                                                                              |                                                                   | High v Control | +                                                         | -0.058    |       |
| <i>Bombus terrestris</i> (In)                                                                                                | <i>Crithidia bombi</i>                                            | High v Control | -                                                         | 0.219     | (80)  |
|                                                                                                                              |                                                                   | Control v Low  | -                                                         | -0.868    |       |
| <i>Mus sp</i> (V)                                                                                                            | <i>Listeria monocytogenes</i> (Int)                               | High v Control | -                                                         | -3.133    | (81)  |
| <i>Cavia porcellus</i> (V)                                                                                                   | <i>Listeria monocytogenes</i> (Int)                               | High v Control | -                                                         | -22.580*  | (81)  |
|                                                                                                                              |                                                                   | Control v Low  | -                                                         | -5.431    |       |
| <i>Anopheles stephensi</i> (In)                                                                                              | <i>Plasmodium yoelii yoelii</i> (Int)                             | Control v Low  | +                                                         | 1.992     | (82)  |
|                                                                                                                              | <i>Microphallus sp</i> (E)                                        | Control v Low  | +                                                         | 1.474     | (83)  |

|                                      |                                     |                |   |       |      |
|--------------------------------------|-------------------------------------|----------------|---|-------|------|
| <i>Potamopyrgus antipodarum</i> (In) |                                     | High v Control | + | 0.634 |      |
| <i>Daphnia magna</i> (In)            | <i>Glugoides intestinalis</i> (Int) | Control v Low  | - | 1.245 | (20) |
| <i>Drosophila melanogaster</i> (In)  | <i>Lactococcus lactis</i> (E)       | Control v Low  | = | 0.229 | (52) |
|                                      | <i>Pseudomonas entomophila</i> (E)  | Control v Low  | - | 2.500 |      |

Supplementary Table 3: Outlier analysis for overall effect size

| <b>Meta-analysis</b> | <b>Outliers</b> | <b>Overall Effect size (Hedge's g)</b> | <b>Standard error</b> | <b>K</b> | <b>T-value</b> | <b>P-value</b> |
|----------------------|-----------------|----------------------------------------|-----------------------|----------|----------------|----------------|
| Quality              | Included        | 1.086                                  | 1.349                 | 33       | 0.805          | 0.427          |
|                      | Removed         | 0.187                                  | 0.575                 | 31       | 0.325          | 0.748          |
| Quantity             | Included        | -1.353                                 | 1.470                 | 19       | -0.929         | 0.307          |
|                      | Removed         | 0.406                                  | 0.546                 | 17       | 0.743          | 0.468          |

Supplementary Table 4: Outlier analysis for moderator variables

| <b>Meta-analysis</b> | <b>Moderator</b>               | <b>Outliers</b> | <b>F – Value</b> | <b>P – Value</b> |
|----------------------|--------------------------------|-----------------|------------------|------------------|
| Quality              | Treatment type                 | Included        | 0.429            | 0.616            |
|                      |                                | Removed         | 0.632            | 0.544            |
|                      | Vertebrate vs Invertebrate     | Included        | 0.044            | 0.957            |
|                      |                                | Removed         | 0.053            | 0.948            |
|                      | Host Type (Broad Grouping)     | Included        | 0.317            | 0.813            |
|                      |                                | Removed         | 0.276            | 0.842            |
|                      | Pathogen Type (Broad Grouping) | Included        | 0.782            | 0.514            |
|                      |                                | Removed         | 0.456            | 0.716            |
| Quantity             | Treatment type                 | Included        | 2.060            | 0.164            |
|                      |                                | Removed         | 0.249            | 0.783            |
|                      | Vertebrate vs Invertebrate     | Included        | 2.646            | 0.102            |
|                      |                                | Removed         | 0.199            | 0.174            |
|                      | Host Type (Broad Grouping)     | Included        | 0.233            | 0.796            |
|                      |                                | Removed         | 0.918            | 0.426            |
|                      | Pathogen Type (Broad Grouping) | Included        | 0.233            | 0.796            |
|                      |                                | Removed         | 0.042            | 0.959            |

Full reference list including studies used in the meta-analysis (Supplementary Table 1 and 2):

1. Cahill AE, Aiello-Lammens ME, Caitlin Fisher-Reid M, Hua X, Karanewsky CJ, Ryu HY, et al. How does climate change cause extinction? *Proc R Soc B Biol Sci*. 2013;280(1750).
2. Stevenson TJ, Visser ME, Arnold W, Barrett P, Biello S, Dawson A, et al. Disrupted seasonal biology impacts health, food security and ecosystems. *Proc R Soc B Biol Sci* . 2015 [cited 2018 Apr 30];282(1817):20151453. Available from: <http://dx.doi.org/10.1098/rspb.2015.1453>
3. Oro D, Genovart M, Tavecchia G, Fowler MS, Martínez-Abraín A. Ecological and evolutionary implications of food subsidies from humans. *Ecol Lett*. 2013 Dec 1;16(12):1501–14. Available from: <https://doi.org/10.1111/ele.12187>
4. Becker DJ, Streicker DG, Altizer S. Linking anthropogenic resources to wildlife-pathogen dynamics: a review and meta-analysis. Lafferty K, editor. *Ecol Lett* . 2015 May [cited 2018 May 1];18(5):483–95. Available from: <http://doi.wiley.com/10.1111/ele.12428>
5. Civitello DJ, Allman BE, Morozumi C, Rohr JR. Assessing the direct and indirect effects of food provisioning and nutrient enrichment on wildlife infectious disease dynamics. *Philos Trans R Soc B Biol Sci*. 2018;373.
6. Altizer S, Becker DJ, Epstein JH, Forbes KM, Gillespie TR, Hall RJ, et al. Food for contagion: synthesis and future directions for studying host-parasite responses to resource shifts in anthropogenic environments. *Philos Trans R Soc Lond B Biol Sci* . 2018;373(1745):20170102. Available from: <http://www.ncbi.nlm.nih.gov/pubmed/29531154>

7. Cornet S, Bichet C, Larcombe S, Faivre B, Sorci G. Impact of Host Nutritional Status on Infection Dynamics and parasite Virulence in a Bird-Malaria System. *J Anim Ecol.* 2013;83:n/a-n/a.
8. Bedhomme S, Agnew P, Sidobre C, Michalakis Y. Virulence reaction norms across a food gradient. *Proc R Soc B Biol Sci* . 2004;271(1540):739–44. Available from: <http://rspb.royalsocietypublishing.org/cgi/doi/10.1098/rspb.2003.2657>
9. Lazzaro BP, Little TJ. Immunity in a variable world. *Philos Trans R Soc B Biol Sci* . 2009;364(1513):15–26. Available from: <http://rstb.royalsocietypublishing.org/cgi/doi/10.1098/rstb.2008.0141>
10. Wolinska J, King KC. Environment can alter selection in host – parasite interactions. *Trends Parasitol.* 2009;25(5):236–44.
11. Chapman CA, Gillespie TR, Goldberg TL. Primates and the ecology of their infectious diseases: How will anthropogenic change affect host-parasite interactions? *Evol Anthropol.* 2005;14(4):134–44.
12. Smith VH, Jones TP, Smith MS. Host nutrition and infectious disease: An ecological view. *Front Ecol Environ.* 2005;3(5):268–74.
13. Chandra RK. Nutrition, immunity and infection: from basic knowledge of dietary manipulation of immune responses to practical application of ameliorating suffering and improving survival. *Proc Natl Acad Sci.* 1996;93(25):14304–7.
14. Beck MA, Kolbeck PC, Shi Q, Rohr LH, Morris VC, Levander OA. Increased virulence of a human enterovirus (coxsackievirus b3) in selenium deficient mice. *J Infect Dis.* 1994;170(2):351–7.
15. Tseng M, Myers JH. The relationship between parasite fitness and host condition in an insect -virus system. *PLoS One.* 2014;9(9).

16. Cressler CE, Nelson WA, Day T, McCauley E. Disentangling the interaction among host resources, the immune system and pathogens. *Ecol Lett* . 2014 Mar 1;17(3):284–93. Available from: <https://doi.org/10.1111/ele.12229>
17. Sheldon BC, Verhulst S. Ecological immunology - costly parasite defenses and trade-offs in evolutionary ecology. *Trends Ecol Evol*. 1996;11(96):317–21.
18. McKean KA, Yourth CP, Lazzaro BP, Clark AG. The evolutionary costs of immunological maintenance and deployment. *BMC Evol Biol*. 2008;8(1).
19. Wakelin D. Nature and nurture: Overcoming constraints on immunity. *Parasitology*. 1989;99(S1):S21–35.
20. Pulkkinen K, Ebert D. Host starvation decreases parasite load and mean host size in experimental populations. *Ecology*. 2004;85(3):823–33.
21. Hall SR, Simonis JL, Nisbet RM, Tessier AJ, Cáceres CE. Resource Ecology of Virulence in a Planktonic Host-Parasite System: An Explanation Using Dynamic Energy Budgets. *Am Nat* . 2009;174(2):149–62. Available from: <http://www.journals.uchicago.edu/doi/10.1086/600086>
22. Medzhitov R, Schneider DS, Soares MP. Disease tolerance as a defense strategy. *Science (80- )*. 2012;335(6071):936–41.
23. Graham AL, Allen JE, Read AF. Evolutionary Causes and Consequences of Immunopathology. *Annu Rev Ecol Evol Syst* . 2005;36(1):373–97. Available from: <http://www.annualreviews.org/doi/10.1146/annurev.ecolsys.36.102003.152622>
24. Long GH, Graham AL. Consequences of immunopathology for pathogen virulence evolution and public health: malaria as a case study, 2011, *Evolutionary Applications* - Wiley Online Library. *Evol Appl* . 2011;4. Available from: <http://onlinelibrary.wiley.com/doi/10.1111/j.1752->

4571.2010.00178.x/full%5Cnpapers2://publication/uuid/11552CE0-0821-4471-8E9C-C16EF20907DF

25. Douek D, Brenchley J, Betts M, Ambrozak D, Hill B, Okamoto Y, et al. HIV preferentially infects HIV-specific CD4+ T cells. *Nature* . 2002;417):2–5. Available from: <http://www.nature.com/nature/journal/v417/n6884/abs/417095a.html>
26. Modjarrad K, Vermund SH. Effect of treating co-infections on HIV-1 viral load: a systematic review. *Lancet Infect Dis*. 2010;10(7):455–63.
27. Indrati Hood M, Skaar E. Nutritional immunity: transition metals at the pathogen–host interface. *Nat Rev Microbiol*. 2012;10(8):525–37.
28. Hart BL. Behavioural adaptations to pathogens and parasites - 5 strategies. *Neurosci Biobehav Rev*. 1990;14(3):273–94.
29. Sorci G, Faivre B. Inflammation and oxidative stress in vertebrate host-parasite systems. *Philos Trans R Soc B Biol Sci* . 2009;364(1513):71–83. Available from: <http://rstb.royalsocietypublishing.org/cgi/doi/10.1098/rstb.2008.0151>
30. Loker E., Adema C., Zhang S, Kelper T., Zha. Invertebrate immune systems-not homogenous, not simple, not well understood. *Immunol Rev*. 2004;198:10–24.
31. Briggs CJ, Hails RS, Barlow ND, Godfray HJC. The dynamics of insect-pathogen interactions. *Ecology of infectious diseases in natural populations*. Cambridge: Cambridge University Press; 1995. p. 295–326.
32. Beck MA, Shi Q, Morris VC, Levander OA. Benign coxsackievirus damages heart muscle in iron-loaded vitamin E-deficient mice. *Free Radic Biol Med*. 2004;
33. Yamazaki H. Relation between Resistance to Bacterial Wilt and calcium nutrition in tomato seedlings. *Japan Agric Res Q*. 2001;35(3):163–9.
34. Moher D, Liberati A, Tetzlaff J, Altman D, Group TP. Preferred Reporting Items for



- Systematic Reviews and Meta-Analyses: The PRISMA Statement. *PLoS Med.* 2009;6(7).
35. Hedges L V. Distribution Theory for Glass's Estimator of Effect Size and Related Estimators. *J Educ Stat* . 1981;6(2):107–28. Available from: <http://www.jstor.org/stable/1164588>
  36. Borenstein M. Introduction to meta-analysis. Chichester : John Wiley & Sons; 2009.
  37. R Core Team. R: A Language and Environment for Statistical Computing. 2017; Available from: <https://www.r-project.org/>
  38. RStudio Team. RStudio: Integrated Development for R. RStudio. Boston; 2016.
  39. Viechtbauer W. Conducting meta-analyses in {R} with the {metafor} package. *J Stat Softw.* 2010;36(3):1–48.
  40. Assink M, Wibbelink CJM. Fitting three-level meta-analytic models in R: A step-by-step tutorial. *Quant Methods Psychol* . 2016;12(3):154–74. Available from: <https://pure.uva.nl/ws/files/26092656/p154.pdf>
  41. Wickham H. *Elegant Graphics for Data Analysis* . New York: Springer-Verlag; 2009. Available from: <http://ggplot2.org>
  42. Wilke C. cowplot: Streamlined Plot Theme and Plot Annotations for “ggplot2.” 2019.
  43. Wickham H, Francois R, Henry L, Muller K. *A Grammar of Data Manipulation*. 2017;
  44. Gillespie and JP, Kanost MR, Trenczek T. Biological Mediators of Insect Immunity. *Annu Rev Entomol* . 1997;42(1):611–43. Available from: <http://www.annualreviews.org/doi/10.1146/annurev.ento.42.1.611>
  45. Smith AD, Botero S, Levander OA. Copper deficiency increases the virulence of amyocarditic and myocarditic strains of coxsackievirus B3 in mice. *J Nutr* . 2008;138(5):849–55. Available from:

<http://www.ncbi.nlm.nih.gov/pubmed/18424590>  
<http://jn.nutrition.org/content/138/5/849.full.pdf>

46. Goldin BR, Li WJ, Mansfield K, Woods M, Wanke C, Freeman L, et al. The effect of micronutrient supplementation on disease progression and death in simian immunodeficiency virus-infected juvenile male rhesus macaques. *J Infect Dis.* 2005;192(2):311–8.
47. Juttukonda LJ, Berends ETM, Zackular JP, Moore JL, Stier MT, Zhang Y, et al. Dietary Manganese Promotes Staphylococcal Infection of the Heart. *Cell Host Microbe.* 2017;22(4):531–542.e8.
48. Jiamton S, Pepin J, Suttent R, Filteau S, Mahakkanukrauh B, Hanshaoworakul W, et al. A randomized trial of the impact of multiple micronutrient supplementation on mortality among HIV-infected individuals living in Bangkok. *Aids.* 2003;17(17):2461–9.
49. Vale PF, Choisy M, Little TJ. Host nutrition alters the variance in parasite transmission potential. *Biol Lett.* 2013;9(2):20121145–20121145. Available from: <http://rsbl.royalsocietypublishing.org/cgi/doi/10.1098/rsbl.2012.1145>
50. Hall SR, Knight CJ, Becker CR, Duffy MA, Tessier AJ, Cáceres CE. Quality matters: Resource quality for hosts and the timing of epidemics. *Ecol Lett.* 2009;12(2):118–28.
51. Conroy TJ, Palmer-Young EC, Irwin RE, Adler LS, C. P, C. BTJ, et al. Food Limitation Affects Parasite Load and Survival of *Bombus impatiens* (Hymenoptera: Apidae) Infected With *Crithidia* (Trypanosomatida: Trypanosomatidae). *Environ Entomol.* 2016;45(5):1212–9. Available from: <https://academic.oup.com/ee/article-lookup/doi/10.1093/ee/nvw099>
52. Kutzer MAM, Kurtz J, Armitage SAO. Genotype and diet affect resistance, survival, and fecundity but not fecundity tolerance. *J Evol Biol.* 2018;31(1):159–71.

53. Moore JH, Pinheiro CCD, Zaenker EI, Bolick DT, Kolling GL, Van Opstal E, et al. Defined nutrient diets alter susceptibility to clostridium difficile associated disease in a murine model. *PLoS One*. 2015;10(7).
54. Allard JP, Aghdassi E, Chau J, Tam C, Kovacs CM, Salit IE, et al. Effects of vitamin E and C supplementation on oxidative stress and viral load in HIV-infected subjects. *AIDS* . 1998;12(13):1653–9. Available from: <http://www.ncbi.nlm.nih.gov/pubmed/9764785>
55. Smith AD, Cheung L, Botero S. Long-term selenium deficiency increases the pathogenicity of a *Citrobacter rodentium* infection in mice. *Biol Trace Elem Res*. 2011;144(1–3):965–82.
56. Beck MA, Handy J, Levander OA. Host nutritional status: The neglected virulence factor. *Trends Microbiol*. 2004;12(9):417–23.
57. Levander OA, Beck MA. Selenium and viral virulence. *Br Med Bull*. 1999;55(3):528–33.
58. M. BL, J. HR. Consequences of resource supplementation for disease risk in a partially migratory population. *Philos Trans R Soc B Biol Sci* . 2018 May 5;373(1745):20170095. Available from: <https://doi.org/10.1098/rstb.2017.0095>
59. L. HJ, E. CC. Resource-driven changes to host population stability alter the evolution of virulence and transmission. *Philos Trans R Soc B Biol Sci* . 2018 May 5;373(1745):20170087. Available from: <https://doi.org/10.1098/rstb.2017.0087>
60. Jokela J, Dybdahl MF, Lively CM. The Maintenance of Sex, Clonal Dynamics, and Host-Parasite Coevolution in a Mixed Population of Sexual and Asexual Snails. *Am Nat* . 2009;174(S1):S43–53. Available from: <http://www.journals.uchicago.edu/doi/10.1086/599080>
61. Zeller M, Koella JC. The Role of the Environment in the Evolution of Tolerance and Resistance to a Pathogen. *Am Nat* . 2017;190(3):000–000. Available from:

<http://www.journals.uchicago.edu/doi/10.1086/692759>

62. Bonneaud C, Giraudeau M, Tardy L, Staley M, Hill G., McGraw K. Rapid antagonistic coevolution in an emerging pathogen and its vertebrate host. *Curr Biol*. 2018;28(18):2978–83.
63. Coombs D, Gilchrist MA, Ball CL. Evaluating the importance of within- and between-host selection pressures on the evolution of chronic pathogens. *Theor Popul Biol*. 2007;72(4):576–91.
64. Lavigne JP, Audibert S, Molinari N, O’Callaghan D, Keriél A. Influence of a high-glucose diet on the sensitivity of *Caenorhabditis elegans* towards *Escherichia coli* and *Staphylococcus aureus* strains. *Microbes Infect*. 2013;15(8–9):540–9.
65. Wu J, Ali S, Huang Z, Shunxiang R, Cai S. Media Composition Influences Growth, Enzyme Activity and Virulence of the Entomopathogen *Metarhizium anisopliae* (Hypocreales: Clavicipitaceae). *Pak J Zool*. 2010;42(4):451–9.
66. Shapiro-Ilan D, Guadalupe Rojas M, Morales-Ramos JA, Lewis EE, Tedders WL. Effects of host nutrition on virulence and fitness of entomopathogenic nematodes: Lipid-and protein-based supplements in *Tenebrio molitor* diets. *J Nematol* . 2008];40(1). Available from: <https://www.ncbi.nlm.nih.gov/pmc/articles/PMC2586524/pdf/13.pdf>
67. Miranda VA, Navarro PD, Davidowitz G, Bronstein J, Stock SP. Effect of insect host age and diet on the fitness of the entomopathogenic nematode-bacteria mutualism. *Symbiosis* . 2013,61(3):145–53. Available from: <https://ezproxy-prd.bodleian.ox.ac.uk:7073/content/pdf/10.1007%2Fs13199-013-0266-7.pdf>
68. Farmer BD, Beck BH, Mitchell AJ, Rawles SD, Straus D. Dietary copper effects survival of channel catfish challenged with *Flavobacterium columnare*. *Aquac Res*. 2017;48:1751–8.

69. Nakamura K, Yamazaki Y, Shiraishi A, Kobayashi S, Harada M, Yoshiyama M, et al. Virulence Differences among *Melissococcus plutonius* Strains with Different Genetic Backgrounds in *Apis mellifera* Larvae under an Improved Experimental Condition. *Sci Rep*. 2016;6.
70. Jacobs JM, Rhodes MR, Baya A, Reimschuessel R, Townsend H, Harrell RM. Influence of nutritional state on the progression and severity of mycobacteriosis in striped bass *Morone saxatilis*. *Dis Aquat Organ*. 2009;87(3):183–97.
71. Visser ME, Grewal HM, Swart EC, Dhansay MA, Walzl G, Swanevelder S, Lombard C, Maartens G. The effect of vitamin A and zinc supplementation on treatment outcomes in pulmonary tuberculosis: a randomized controlled trial. *Am J Clin Nutr* 2011. 2011;93(1):93–100.
72. Zimerman-Lax N, Tamir-Ariel D, Shenker M, Burdman S. Decreased potassium fertilization is associated with increased pathogen growth and disease severity caused by *Acidovorax citrulli* in melon foliage. *J Gen Plant Pathol*. 2018;84(1):27–34.
73. Gisbert E, Fournier V, Solovyev M, Skalli A, Andree KB. Diets containing shrimp protein hydrolysates provided protection to European sea bass (*Dicentrarchus labrax*) affected by a *Vibrio pelagius* natural infection outbreak. *Aquaculture* . 2018;495:136–43. Available from:  
<http://www.sciencedirect.com/science/article/pii/S0044848618301698>
74. Kinnula H, Mappes J, Valkonen JK, Pulkkinen K, Sundberg L-R. Higher resource level promotes virulence in an environmentally transmitted bacterial fish pathogen. *Evol Appl*. 2017 Jun;10(5):462–70.
75. Bruno JF, Petes LE, Harvell CD, Hettinger A. Nutrient enrichment can increase the severity of coral diseases. *Ecol Lett*. 2003 Dec;6(12):1056–61.

76. Buck JC, Rohr JR, Blaustein AR. Effects of nutrient supplementation on host-pathogen dynamics of the amphibian chytrid fungus: a community approach. *Freshw Biol* . 2016 Jan 1;61(1):110–20. Available from: <https://doi.org/10.1111/fwb.12685>
77. Nutini L., Berberic N. Effect of diet and strain difference on virulence of staphylococcus aureus for mice. *Appl Microbiol* . 1965 ;13(4). Available from: [http://apps.webofknowledge.com/full\\_record.do?product=WOS&search\\_mode=GeneralSearch&qid=14&SID=E3k115aLxBKHxwIF7G8&page=1&doc=1](http://apps.webofknowledge.com/full_record.do?product=WOS&search_mode=GeneralSearch&qid=14&SID=E3k115aLxBKHxwIF7G8&page=1&doc=1)
78. Restif O, Kaltz O. Condition-dependent virulence in a horizontally and vertically transmitted bacterial parasite. *Oikos*. 2006;114(1):148–58.
79. Jokela J, Lively CM, Taskinen J, Peters AD. Effect of starvation on parasite-induced mortality in a freshwater snail (*Potamopyrgus antipodarum*). *Oecologia*. 1999;119(3):320–5.
80. Sadd BM. Food-environment mediates the outcome of specific interactions between a bumblebee and its trypanosome parasite. *Evolution (N Y)*. 2011;65(10):2995–3001.
81. Friedman ME, Kautter DA. Effect of nutrition on the respiratory virulence of *Listeria monocytogenes*. *J Bacteriol*. 1962;83(3):456–62.
82. Moller-Jacobs LL, Murdock CC, Thomas MB. Capacity of mosquitoes to transmit malaria depends on larval environment. *Parasites and Vectors*. 2014;7(1).
83. Krist AC, Jokela J, Wiehn J, Lively CM. Effects of host condition on susceptibility to infection, parasite developmental rate, and parasite transmission in a snail-trematode interaction. *J Evol Biol*. 2004;17(1):33–40.
